# Supplementary material for: Repertoire and evolution of miRNA genes in four divergent nematode species
Source: HighWire-hosted journal article supplement (doi:10.1101/gr.093781.109), 2009-09-15
Supplement: SupplementalFigure_1.pdf [file SupplementalFigure_1.pdf]

Supplemental Fig. S1 de Wit et al.

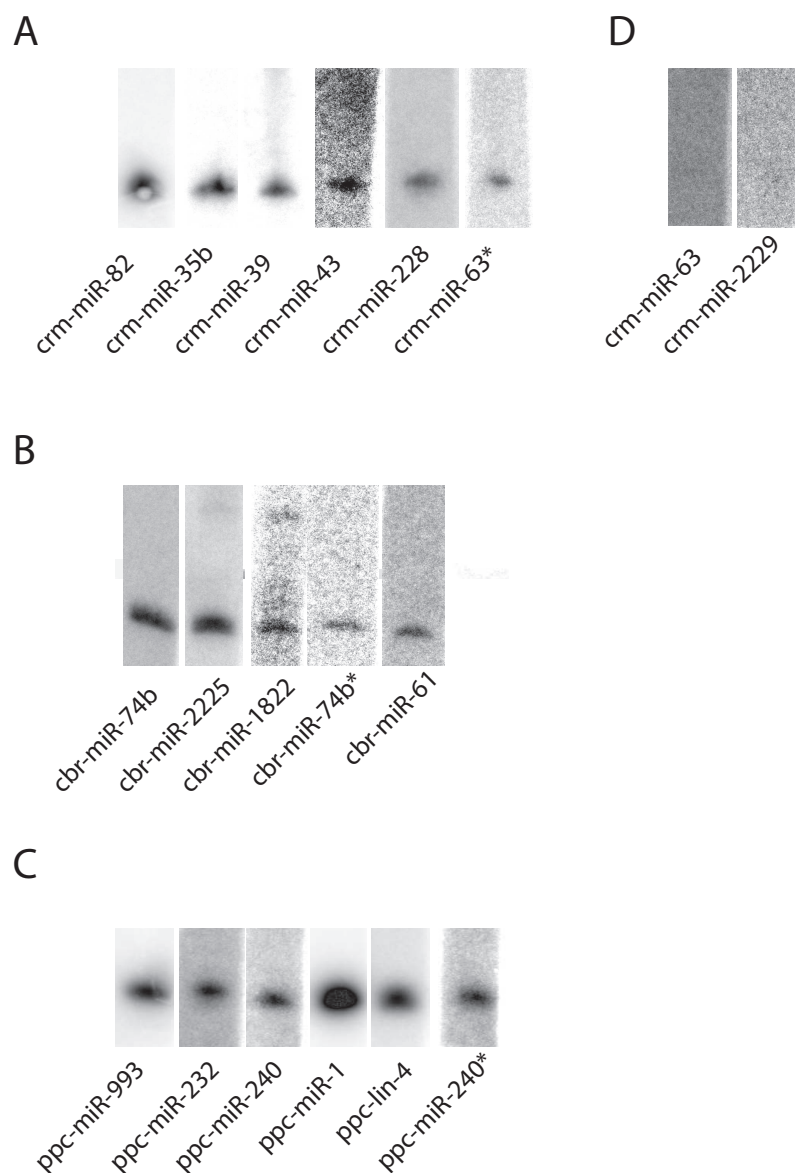

**Figure S1: Northern analysis of known and candidate miRNAs.** The presence of a number of randomly chosen candidate miRNAs was confirmed by Northern blotting. Out of this set of 19, of which one was known miRNAs in *C. briggsae* (cbr-miR-61), 17 (89%) showed a distinct band around the expected size (ca 22nt). A) *C. remanei*, B) *C. briggsae*, C) *P. pacificus*. Negative blots are shown in D. Probe sequences are described in the supplemental files.
