# Supplementary material for: Repertoire and evolution of miRNA genes in four divergent nematode species
Source: HighWire-hosted journal article supplement (doi:10.1101/gr.093781.109), 2009-09-15
Supplement: SupplementalFigure_3.pdf [file SupplementalFigure_3.pdf]

Figure S3 de Wit et al.

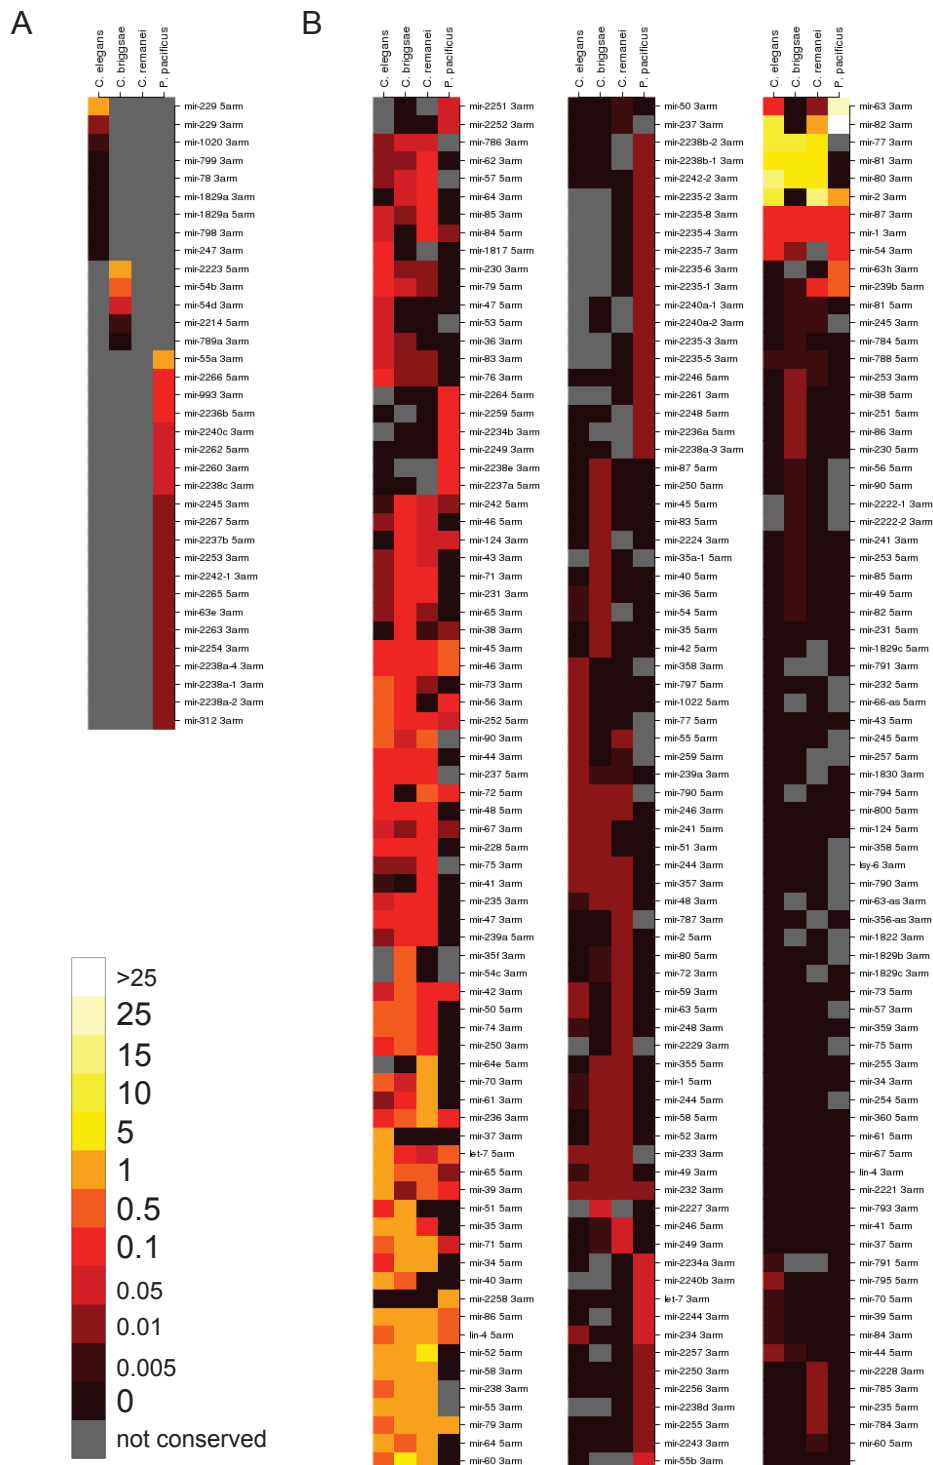

Figure S3: Heatmaps showing miRNA expression levels. Color heatmaps show the relative read frequencies for all miRNAs (known and novel). Colorbar shows the representative colors for the percentages. A) Heatmap shows miRNAs that are not conserved in any of the other three species. Data is sorted by read frequency. B) Heatmaps show miRNAs that are conserved in at least one other species. Data has been clustered using hierarchical clustering (euclidian distance).
