# Supplementary material for: Repertoire and evolution of miRNA genes in four divergent nematode species
Source: HighWire-hosted journal article supplement (doi:10.1101/gr.093781.109), 2009-09-15
Supplement: SupplementalFigure_6.pdf [file SupplementalFigure_6.pdf]

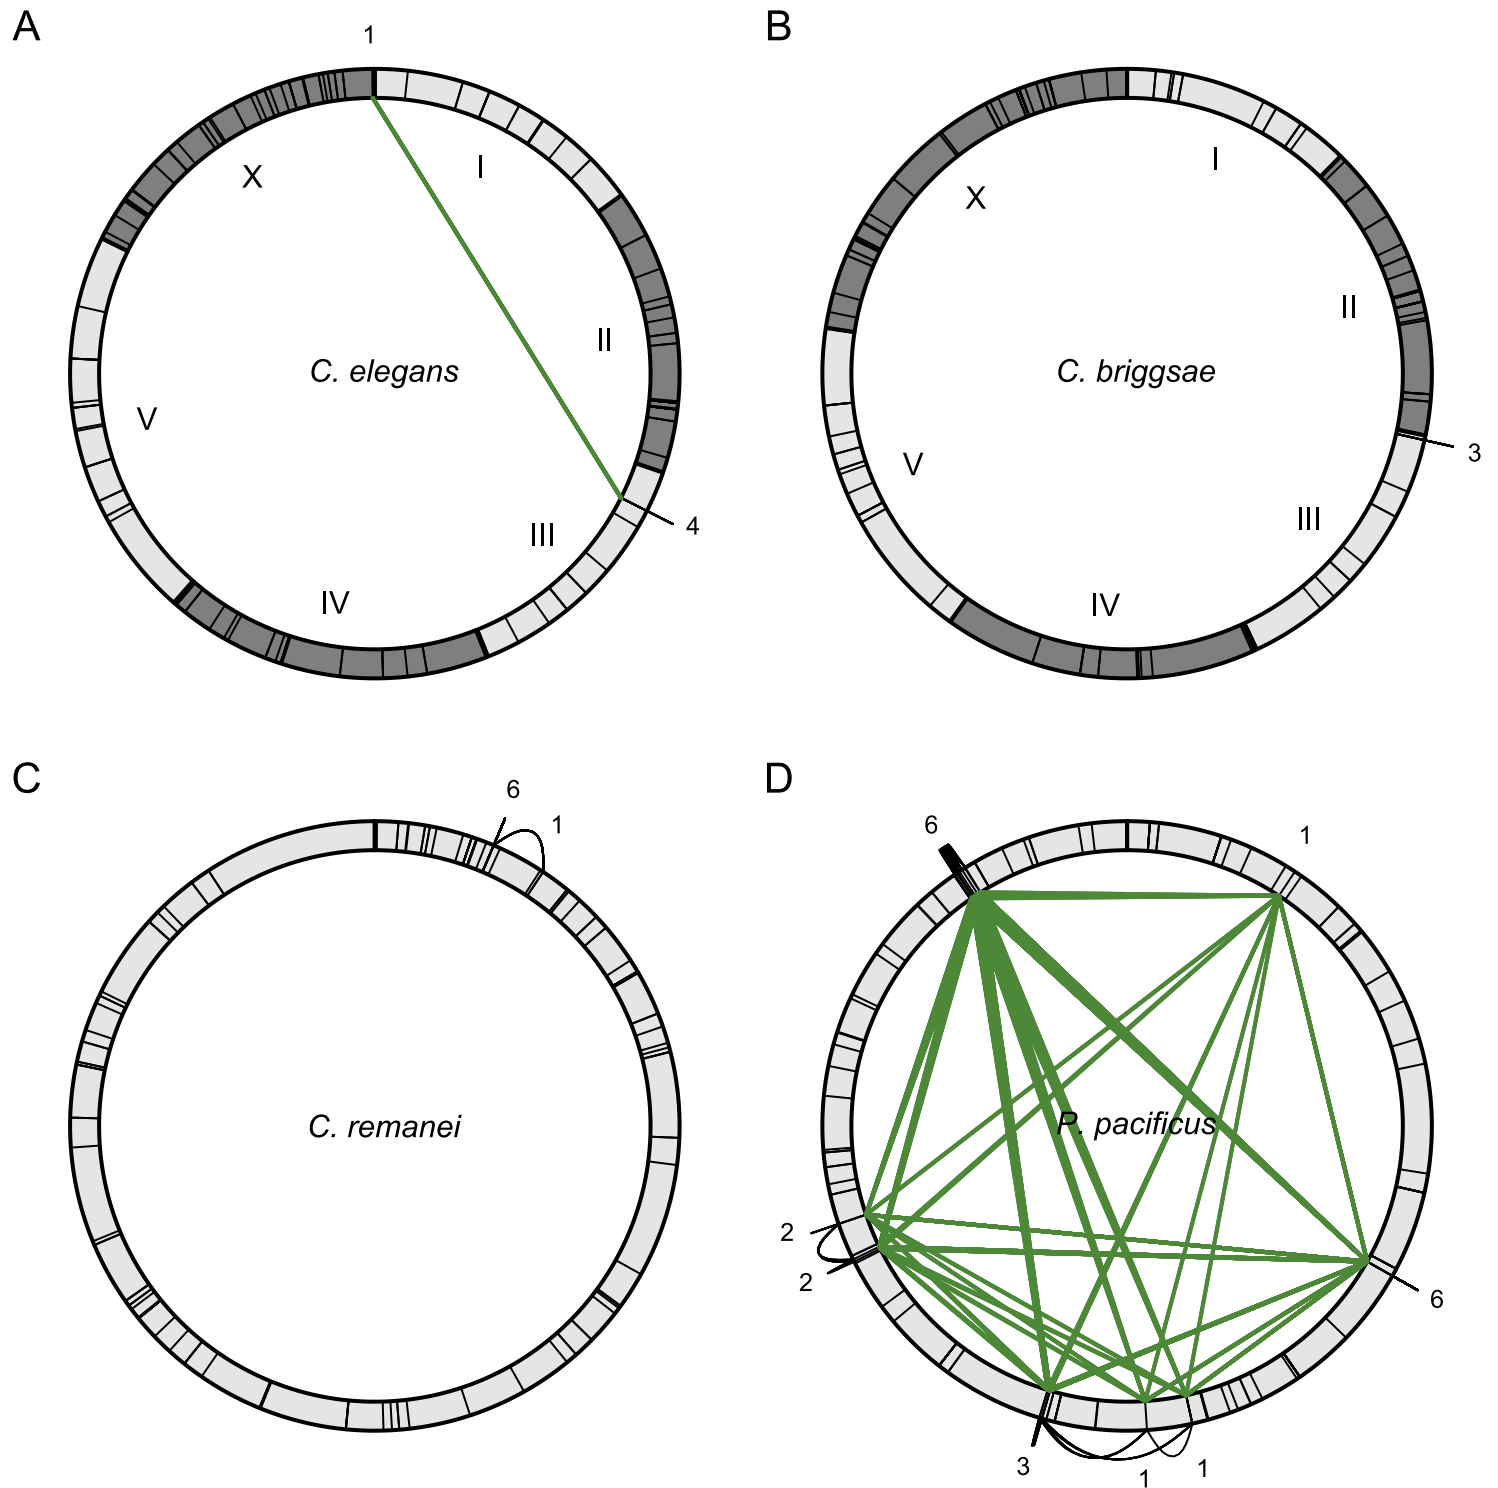

**Figure S6: The *mir-63-66* family is strongly expanded in *P. pacificus*.** Circular diagrams represent the genomes of the four species, with perpendicular lines representing all known and identified miRNA copies. Lines connect the family members: nearby family members are linked on the outside of the circle, whereas genomically distant family members are linked by lines inside the circle. Numbers indicate the amount of copies in a given region. Chromosomes in A) and B) are highlighted alternatingly in dark and light grey.
